# Supplementary material
Source: PubMed Central journal article supplement (PMC6942671)
Supplement: NIHMS1545312-supplement-2.pdf [file NIHMS1545312-supplement-2.pdf]

## Supporting information

### **Fusion of the N-terminal domain of bacterial Enzyme I facilitates recombinant expression and purification of the human RNA demethylases FTO and Alkbh5**

Balabhadra Khatiwada,<sup>1,‡</sup> Jeffrey A. Purslow,<sup>1,‡</sup> Eric S. Underbakke<sup>2</sup> and Vincenzo Venditti<sup>1,2,\*</sup>

<sup>1</sup> *Department of Chemistry, Iowa State University, Ames, Iowa 50011, USA.*

<sup>2</sup> *Roy J. Carver Department of Biochemistry, Biophysics and Molecular Biology, Iowa State University, Ames, Iowa 50011, USA.*

‡Equal contribution

\*Address correspondence to: Vincenzo Venditti, Department of Chemistry, Iowa State University, Hach Hall, 2438 Pammel Drive, Ames, IA 50011, USA. email: [venditti@iastate.edu](mailto:venditti@iastate.edu); Tel. 515-294-1044; Fax: 515-294-7550; ORCID 0000-0001-8734-0400.

**Nucleotide sequence of the EIN fusion construct used in the present work.** Blocks are connected together as indicated in Figure 2 (see main text).

**NcoI recognition site**

5'-CCATGG-3'

**Spacer**

5'-GCAGCAGC-3'

**Histidine tag**

5'-CATCATCATCATCACCAT-3'

**Spacer**

5'-AGCAGC-3'

**EIN tag**

5'-ATTTTCAGGCATTTTAGCATCCCCGGGTATCGCTTTTCGGTAAAGCTCTGCTTCTGAAAGAA  
GACGAAATTGTCATTGACCGGAAAAAATTTCTGCCGACCAGGTTGATCAGGAAGTTGAAC  
GTTTTCTGAGCGGTCTGTTGCAAGGCATCAGCCCAGCTGGAAACGATCAAACGAAAGCTG  
GTGAAACGTTTCGGTGAAGAAAAAGAAGCCATCTTTGAAGGGCATATTATGCTGCTCGAAGA  
TGAGGAGCTGGAGCAGGAAATCATAGCCCTGATTAAGATAAGCACATGACAGCTGACGC  
AGCTGCTCATGAAGTTATCGAAGGTCAGGCTTCTGCCCTGGAAGAGCTGGATGATGAATAC  
CTGAAAGAACGTGCGGCTGACGTACGTGATATCGGTAAGCGCCTGCTGCGCAACATCCTG  
GGCCTGAAGATTATCGACCTGAGCGCCATTGAGGATGAAGTCATTCTGGTTGCCGCTGAC  
CTGACGCCGTCCGAAACCGCACAGCTGAACCTGAAGAAGGTGCTGGGTTTTCATCACCGAC  
GCGGGTGGCCGTACTTCCCACACCTCTATCATGGCGCGTTCTCTGGAACCTACCTGCTATC  
GTGGGTACCGGTAGCGTCACCTCTCAGGTGAAAAATGACGACTATCTGATTCTGGATGCC  
GTAAATAATCAGGTTTACGTCAATCCAACCAACGAAGTTATTGATAAAATGCGCGCTGTTCA  
GGAGCAAGTGGCTTCTGAA-3'

**TEV recognition sequence**

5'-CATAGCAGCGAAAATCTGTATTTTCAGAGC-3'

**NdeI recognition site**

5'-CATATG-3'

**Alkbh5**

5'-CCGGAACGTAGCGATTATGAAGAACAGCAGCTGCAGAAAGAAGAAGAAGCACGTAAAG  
TTAAAAGCGGTATTCGTCAGATGCGTCTGTTTAGCCAGGATGAATGTGCAAAAATTGAAGC  
CCGTATTGATGAAGTTGTTAGCCGTGCAGAAAAAGGCCTGTATAATGAACATACCGTTGAT  
CGTGCACCGCTGCGCAATAAATACTTTTTTGGTGAAGGTTATACCTACGGTGCACAGCTGC  
AAAAACGTGGTCCGGGTCAAGAACGTCTGTATCCGCCTGGTGTGTTGATGAAATTCGGAA  
ATGGGTTTCATCAGCTGGTTATTCAGAACTGGTTGAACATCGTGTATTCCGGAAGGTTTTG  
TTAATAGCGCAGTGATCAATGATTATCAGCCTGGTGGTTGTATTGTGAGCCATGTTGATCC  
GATTCATATTTTTGAACGTCCGATTGTTAGCGTGAGCTTTTTTAGCGATAGCGCACTGTGTT  
TTGGTTGCAAATTTTCAGTTTTAAACCGATTCTGTGTTAGCGAACCGGTTCTGAGCCTGCCGGT  
TCGTGTTGGTAGCGTTACCGTTCTGAGCGGTTATGCAGCAGATGAAATTACCCATTGTATT  
CGTCCGCAGGATATCAAAGAACGTTCGTGCAGTTATTATTCTGCGTAAAACCCGTCTGGATG  
CACCGCGTCTGTAA -3'

**FTO**

5'-ACCCCGAAAGACGACGAATTTTACCAGCAATGGCAACTGAAGTACCCGAAACTGATCCT  
GCGTGAAGCATCGAGCGTGAGCGAAGAAGTTC AAGAAGCATTCTGAC  
CCTGCATAAGCACGGCTGCCTGTTCCGTGATCTGGTGCGCATT CAGGGTAAAGACCTGCT  
GACCCCGTTAGCCGATTCTGATCGGCAACCCGGGTTGTACGTATAAGTACCTGAATACC  
CGCCTGTTTACGGTCCCGTGGCCGGTGAAAGGCTCTAACATTAAGCACACCGAAGCGGAA  
ATCGCGGCCGCATGCGAAACGTTCCCTGAAACTGAATGATTATCTGCAGATTGAAACCATCC  
AAGCTCTGGAAGAAGTGGCTGCGAAAGAAAAGGCTAACGAAGATGCGGTCCCGCTGTGTA  
TGTCAGCGGACTTTCCGCGTGTGGGCATGGGTAGCTCTTATAATGGCCAAGATGAAGTTG  
ACATCAAATCGCGCGCCGCATACAACGTCACGCTGCTGAATTTTATGGACCCGCAGAAAAT  
GCCGTATCTGAAGGAAGAACCGTACTTCGGCATGGGTAAAATGGCGGTGTCATGGCATCA  
CGATGAAAACCTGGTTGACCGTTCGGCTGTGGCGGTTTATTCATACTCGTGCGAAGGTCC  
GGAAGAAGAAAGTGAAGATGACTCCCATCTGGAAGGCCGCGATCCGGACATTTGGCACGT  
GGGTTTTAAAATTAGCTGGGATATTGAAACCCCGGGTCTGGCAATCCCGCTGCATCAGGGT  
GACTGCTATTTTATGCTGGATGACCTGAATGCCACCCATCAGCACTGTGTTCTGGCAGGCA  
GCCAACCGCGTTTCAGTTCACGCACCGCGTCGCCGAATGTTCTACCGGTACGCTGGATT  
ACATTCTGCAGCGTTGCCAACTGGCACTGCAGAACGTTTGTGATGACGTCGATAATGATGA  
CGTCAGCCTGAAATCTTTTGAACCGGCCGTGCTGAAGCAGGGCGAAGAAATCCATAACGA  
AGTTGAATTCGAATGGCTGCGCCAGTTTTGGTTCCAAGGTAATCGTTATCGCAAATGCACC  
GATTGGTGGTGTGTCAGCCGATGGCCCAACTGGAAGCACTGTGGAAAAAGATGGAAGGCGTG  
ACGAACGCAGTTCTGCATGAAGTCAAACGTGAAGGTCTGCCGGTGGAAACAGCGCAACGAA  
ATTCTGACCGCCATCCTGGCAAGTCTGACGGCTCGTCAGAATCTGCGTCGCGAATGGCAC  
GCGCGCTGCCAATCCCGTATTGCTCGCACCCCTGCCGGCGGATCAGAAACCGGAATGTCGT  
CCGTA CTGGGAAAAGGATGACGCCAGCATGCCGCTGCCGTTTGACCTGACCGACATCGTC  
TCTGAACTGCGCGGCCAACTGCTGGAAGCGAAACCGTAA -3'

**BamHI recognition site**

5'-GGATCC-3'

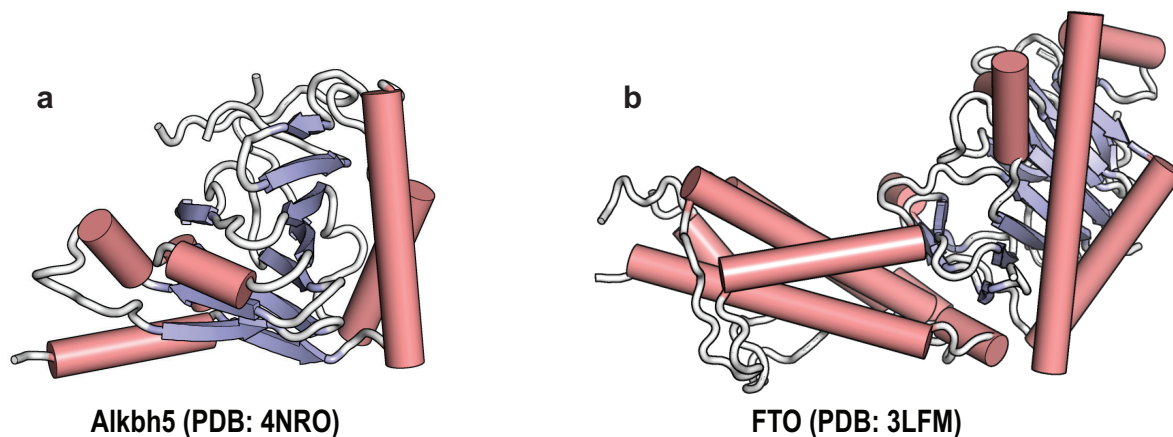

**Figure S1.** Crystal structures of (a) human Alkbh5 (PDB code: 4NRO)<sup>1</sup> and (b) FTO (PDB code: 3LFM)<sup>2</sup>.

### References

1. Feng, C.; Liu, Y.; Wang, G.; Deng, Z.; Zhang, Q.; Wu, W.; Tong, Y.; Cheng, C.; Chen, Z., Crystal structures of the human RNA demethylase Alkbh5 reveal basis for substrate recognition. *J Biol Chem* **2014**, *289* (17), 11571-83.
2. Han, Z.; Niu, T.; Chang, J.; Lei, X.; Zhao, M.; Wang, Q.; Cheng, W.; Wang, J.; Feng, Y.; Chai, J., Crystal structure of the FTO protein reveals basis for its substrate specificity. *Nature* **2010**, *464* (7292), 1205-9.
